# Supplementary material for: Trends in singleton preterm birth in Victoria, 2007 to 2017: A consecutive cross‐sectional study
Source: PubMed Central journal article supplement — Acta Obstet Gynecol Scand. 2021 Feb 12;100(7):1230–8. doi: 10.1111/aogs.14074 (PMC8359202; doi:10.1111/aogs.14074), 2021-02-12
Supplement: AOGS-100-1230-s001.pdf [file AOGS-100-1230-s001.pdf]

## SUPPORTING INFORMATION

Figure S1: Incidence of different complications of pregnancy in liveborn singletons: Victoria, 2007-2017<sup>a</sup>

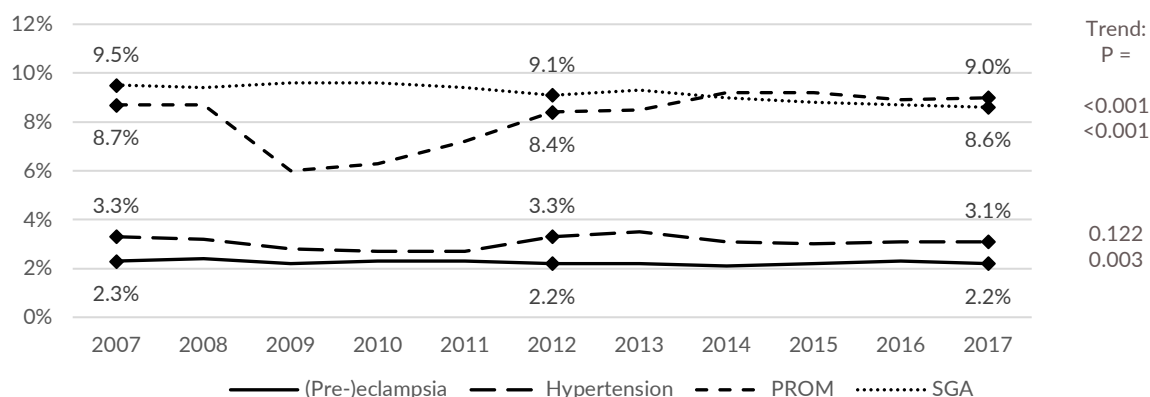

<sup>a</sup> Trends between 2007 and 2017 were analysed using a chi-squared test for linear trend.

Table S1. Trends in preterm birth in liveborn singletons: Victoria, 2007-2017

| Group          |                     | 2007   |        | 2012   |        | 2017   |        | Risk difference | Trend 2007-2017 <sup>a</sup> |
|----------------|---------------------|--------|--------|--------|--------|--------|--------|-----------------|------------------------------|
|                |                     | %      | (N)    | %      | (N)    | %      | (N)    | 2007-2017       | P =                          |
| All singletons | Total preterm birth | 5.9%   | (4074) | 6.0%   | (4486) | 6.4%   | (4893) | +0.5%           | <0.001                       |
|                | - spontaneous       | 3.4%   | (2344) | 3.0%   | (2243) | 2.8%   | (2163) | -0.6%           | <0.001                       |
|                | - iatrogenic        | 2.5%   | (1730) | 3.0%   | (2243) | 3.6%   | (2730) | +1.1%           | <0.001                       |
|                | Early preterm birth | 1.5%   | (1046) | 1.4%   | (1042) | 1.5%   | (1117) | -0.1%           | 0.856                        |
|                | - spontaneous       | 0.9%   | (599)  | 0.7%   | (542)  | 0.7%   | (569)  | -0.1%           | 0.001                        |
|                | - iatrogenic        | 0.6%   | (447)  | 0.7%   | (500)  | 0.7%   | (548)  | +0.1%           | 0.001                        |
|                | Late preterm birth  | 4.4%   | (3028) | 4.6%   | (3444) | 4.9%   | (3776) | +0.5%           | <0.001                       |
|                | - spontaneous       | 2.5%   | (1745) | 2.3%   | (1701) | 2.1%   | (1594) | -0.4%           | <0.001                       |
| - iatrogenic   | 1.9%                | (1283) | 2.3%   | (1743) | 2.8%   | (2182) | +1.0%  | <0.001          |                              |
| SGA            | Total preterm birth | 5.9%   | (387)  | 6.4%   | (440)  | 8.4%   | (560)  | +2.6%           | <0.001                       |
|                | - spontaneous       | 1.6%   | (106)  | 1.4%   | (95)   | 1.2%   | (80)   | -0.4%           | <0.001                       |
|                | - iatrogenic        | 4.3%   | (281)  | 5.0%   | (345)  | 7.2%   | (480)  | +3.0%           | <0.001                       |
|                | Early preterm birth | 1.5%   | (97)   | 1.4%   | (93)   | 2.0%   | (134)  | +0.5%           | 0.045                        |
|                | - spontaneous       | 0.2%   | (15)   | 0.1%   | (9)    | 0.2%   | (13)   | 0.0%            | 0.069                        |
|                | - iatrogenic        | 1.2%   | (82)   | 1.2%   | (84)   | 1.8%   | (121)  | +0.6%           | 0.006                        |
|                | Late preterm birth  | 4.4%   | (290)  | 5.1%   | (347)  | 6.4%   | (426)  | +2.0%           | <0.001                       |
|                | - spontaneous       | 1.4%   | (91)   | 1.3%   | (86)   | 1.0%   | (67)   | -0.4%           | <0.001                       |
| - iatrogenic   | 3.0%                | (199)  | 3.8%   | (261)  | 5.4%   | (359)  | 2.4%   | <0.001          |                              |
| Hypertension   | Total preterm birth | 5.7%   | (128)  | 7.1%   | (175)  | 9.0%   | (215)  | +3.4%           | <0.001                       |
|                | - spontaneous       | 1.7%   | (39)   | 1.2%   | (29)   | 1.7%   | (40)   | 0.0%            | 0.119                        |
|                | - iatrogenic        | 3.9%   | (89)   | 5.9%   | (146)  | 7.3%   | (175)  | +3.4%           | <0.001                       |

|                              |                     |       |        |       |                |       |        |       |        |
|------------------------------|---------------------|-------|--------|-------|----------------|-------|--------|-------|--------|
|                              | Early preterm birth | 0.9%  | (20)   | 1.5%  | (38)           | 2.1%  | (49)   | +1.2% | 0.002  |
|                              | - spontaneous       | 0.4%  | (8)    |       | - <sup>c</sup> | 0.3%  | (7)    | -0.1% | 0.196  |
|                              | - iatrogenic        | 0.5%  | (12)   | 1.4%  | (35)           | 1.8%  | (42)   | +1.2% | <0.001 |
|                              | Late preterm birth  | 4.8%  | (108)  | 5.6%  | (137)          | 7.0%  | (166)  | +2.2% | <0.001 |
|                              | - spontaneous       | 1.4%  | (31)   | 1.1%  | (26)           | 1.4%  | (33)   | 0.0%  | 0.256  |
|                              | - iatrogenic        | 3.4%  | (77)   | 4.5%  | (111)          | 5.6%  | (133)  | +2.2% | <0.001 |
| (Pre)eclampsia               | Total preterm birth | 30.4% | (494)  | 28.7% | (485)          | 28.6% | (481)  | -1.8% | 0.056  |
|                              | - spontaneous       | 1.1%  | (18)   | 1.4%  | (24)           | 1.6%  | (27)   | +0.5% | 0.955  |
|                              | - iatrogenic        | 29.3% | (476)  | 27.3% | (461)          | 27.0% | (454)  | -2.3% | 0.050  |
|                              | Early preterm birth | 12.3% | (199)  | 10.3% | (174)          | 10.2% | (172)  | -2.0% | 0.115  |
|                              | - spontaneous       | 0.4%  | (6)    |       | - <sup>c</sup> | 0.4%  | (6)    | 0.0%  | 0.594  |
|                              | - iatrogenic        | 11.9% | (193)  | 10.1% | (170)          | 9.9%  | (166)  | -2.0% | 0.133  |
|                              | Late preterm birth  | 18.2% | (295)  | 18.4% | (311)          | 18.4% | (309)  | +0.2% | 0.325  |
|                              | - spontaneous       | 0.7%  | (12)   | 1.2%  | (20)           | 1.2%  | (21)   | +0.5% | 0.750  |
|                              | - iatrogenic        | 17.4% | (283)  | 17.2% | (291)          | 17.1% | (288)  | -0.3% | 0.268  |
| PROM                         | Total preterm birth | 20.5% | (1235) | 17.4% | (1095)         | 17.7% | (1219) | -2.8% | <0.001 |
|                              | - spontaneous       | 12.1% | (730)  | 9.0%  | (569)          | 9.6%  | (658)  | -2.6% | <0.001 |
|                              | - iatrogenic        | 8.4%  | (505)  | 8.3%  | (526)          | 8.2%  | (561)  | -0.2% | 0.057  |
|                              | Early preterm birth | 5.5%  | (328)  | 4.4%  | (278)          | 4.6%  | (319)  | -0.8% | <0.001 |
|                              | - spontaneous       | 3.8%  | (227)  | 2.8%  | (178)          | 3.0%  | (203)  | -0.8% | 0.001  |
|                              | - iatrogenic        | 1.7%  | (101)  | 1.6%  | (100)          | 1.7%  | (116)  | 0.0%  | 0.128  |
|                              | Late preterm birth  | 15.1% | (907)  | 13.0% | (817)          | 13.1% | (900)  | -2.0% | <0.001 |
|                              | - spontaneous       | 8.4%  | (503)  | 6.2%  | (391)          | 6.6%  | (455)  | -1.7% | <0.001 |
|                              | - iatrogenic        | 6.7%  | (404)  | 6.8%  | (426)          | 6.5%  | (445)  | -0.2% | 0.188  |
| Non-complicated <sup>b</sup> | Total preterm birth | 3.9%  | (2080) | 4.2%  | (2524)         | 4.5%  | (2733) | +0.7% | <0.001 |
|                              | - spontaneous       | 2.8%  | (1499) | 2.6%  | (1555)         | 2.3%  | (1398) | -0.5% | <0.001 |
|                              | - iatrogenic        | 1.1%  | (581)  | 1.6%  | (969)          | 2.2%  | (1335) | +1.1% | <0.001 |
|                              | Early preterm birth | 0.9%  | (479)  | 0.9%  | (525)          | 0.9%  | (544)  | 0.0%  | 0.937  |
|                              | - spontaneous       | 0.7%  | (351)  | 0.6%  | (352)          | 0.6%  | (348)  | -0.1% | <0.001 |
|                              | - iatrogenic        | 0.2%  | (128)  | 0.3%  | (173)          | 0.3%  | (196)  | +0.1% | <0.001 |
|                              | Late preterm birth  | 3.0%  | (1601) | 3.4%  | (1999)         | 3.6%  | (2189) | +0.6% | <0.001 |
|                              | - spontaneous       | 2.1%  | (1148) | 2.0%  | (1203)         | 1.7%  | (1050) | -0.4% | <0.001 |
|                              | - iatrogenic        | 0.8%  | (453)  | 1.3%  | (796)          | 1.9%  | (1139) | +1.0% | <0.001 |

<sup>a</sup> Trends between 2007 and 2017 were analysed using a chi-squared test for linear trend.

<sup>b</sup> Singleton pregnancies not complicated by SGA, hypertension, (pre)eclampsia or PROM.

<sup>c</sup> Cell size of 4 or less, data not shown for privacy reasons.

Table S2. Trends in perinatal mortality in singletons: Victoria, 2007-2017<sup>a,b</sup>

| Group                        |                     | ≥20 weeks |          |              | ≥24 weeks |          |            | ≥28 weeks |          |            | ≥34 weeks |          |              | ≥37 weeks |          |              |
|------------------------------|---------------------|-----------|----------|--------------|-----------|----------|------------|-----------|----------|------------|-----------|----------|--------------|-----------|----------|--------------|
|                              |                     | '07<br>‰  | '17<br>‰ | Trend<br>P = | '07<br>‰  | '17<br>‰ | Trend<br>P | '07<br>‰  | '17<br>‰ | Trend<br>P | '07<br>‰  | '17<br>‰ | Trend<br>P = | '07<br>‰  | '17<br>‰ | Trend<br>P = |
| All singletons               | Perinatal mortality | 6.7       | 5.7      | <0.001       | 4.6       | 3.8      | <0.001     | 3.6       | 2.9      | <0.001     | 2.5       | 2.1      | <0.001       | 2.0       | 1.5      | <0.001       |
|                              | Stillbirth          | 4.7       | 4.0      | <0.001       | 3.3       | 2.7      | <0.001     | 2.7       | 2.2      | <0.001     | 1.8       | 1.5      | <0.001       | 1.4       | 1.1      | <0.001       |
|                              | Neonatal mortality  | 2.1       | 1.8      | 0.013        | 1.3       | 0.9      | 0.008      | 1.0       | 0.8      | 0.266      | 0.7       | 0.6      | 0.340        | 0.6       | 0.4      | 0.111        |
| Complicated <sup>c</sup>     | Perinatal mortality | 12.9      | 11.6     | <0.001       | 7.9       | 6.8      | <0.001     | 5.9       | 4.8      | <0.001     | 3.8       | 3.6      | 0.002        | 3.2       | 2.5      | 0.002        |
|                              | Stillbirth          | 9.7       | 8.9      | <0.001       | 5.9       | 5.3      | <0.001     | 4.3       | 3.6      | <0.001     | 2.6       | 2.6      | <0.001       | 2.3       | 2.1      | 0.002        |
|                              | Neonatal mortality  | 3.3       | 2.7      | 0.137        | 2.0       | 1.5      | 0.272      | 1.5       | 1.2      | 0.532      | 1.2       | 1.0      | 0.785        | 0.9       | 0.4      | 0.362        |
| Non-complicated <sup>d</sup> | Perinatal mortality | 4.7       | 4.2      | 0.012        | 3.5       | 2.8      | 0.007      | 2.9       | 2.4      | 0.044      | 2.1       | 1.7      | 0.023        | 1.6       | 1.3      | 0.013        |
|                              | Stillbirth          | 3.1       | 2.7      | 0.063        | 2.5       | 2.0      | 0.064      | 2.1       | 1.8      | 0.045      | 1.5       | 1.2      | 0.023        | 1.1       | 0.9      | 0.019        |
|                              | Neonatal mortality  | 1.6       | 1.5      | 0.087        | 1.0       | 0.8      | 0.030      | 0.7       | 0.7      | 0.567      | 0.6       | 0.5      | 0.496        | 0.5       | 0.4      | 0.327        |

<sup>a</sup> Trends between 2007 and 2017 were analysed using a chi-squared test for linear trend.

<sup>b</sup> Perinatal mortality and stillbirth risk are expressed per 1000 births. Neonatal mortality is expressed per 1000 live births.

<sup>c</sup> Singleton pregnancies complicated by SGA, hypertension, (pre)eclampsia or PROM.

<sup>d</sup> Singleton pregnancies not complicated by SGA, hypertension, (pre)eclampsia or PROM.
